# Supplementary material
Source: PubMed Central journal article supplement (PMC5753040)
Supplement: EMBJ-37-39-s001.pdf [file EMBJ-37-39-s001.pdf]

# Guanylyl cyclase-G is an alarm pheromone receptor in mice

Ying-Chi Chao, Joerg Fleischer and Ruey-Bing Yang

## Appendix

### Table of Contents

|                                                                                                                                                                                                    | Page     |
|----------------------------------------------------------------------------------------------------------------------------------------------------------------------------------------------------|----------|
| <b>Appendix Figures.....</b>                                                                                                                                                                       | <b>2</b> |
| Appendix Figure S1 - Butyric acid and 2-heptanone do not activate GC-G enzymatic activity.....                                                                                                     | 2        |
| Appendix Figure S2 - The $\Delta$ ECD variant of GC-G is capable of stimulated cGMP synthesis.....                                                                                                 | 3        |
| Appendix Figure S3 - Butyric acid and 2-heptanone do not bind to the ECD of GC-G.....                                                                                                              | 5        |
| Appendix Figure S4 - Representative ratiometric calcium transients following exposure to SBT (1 $\mu$ M) in GFP-positive GG neurons from OMP-GFP/GC-G <sup>+/+</sup> and OMP-GFP/GC-G-KO pups..... | 6        |
| Appendix Figure S5 - Walking traces of all WT and GC-G-KO mice used in the avoidance behavior tests.....                                                                                           | 7        |
| Appendix Figure S6 - DMSO does not affect freezing behavior and walking distances.....                                                                                                             | 8        |

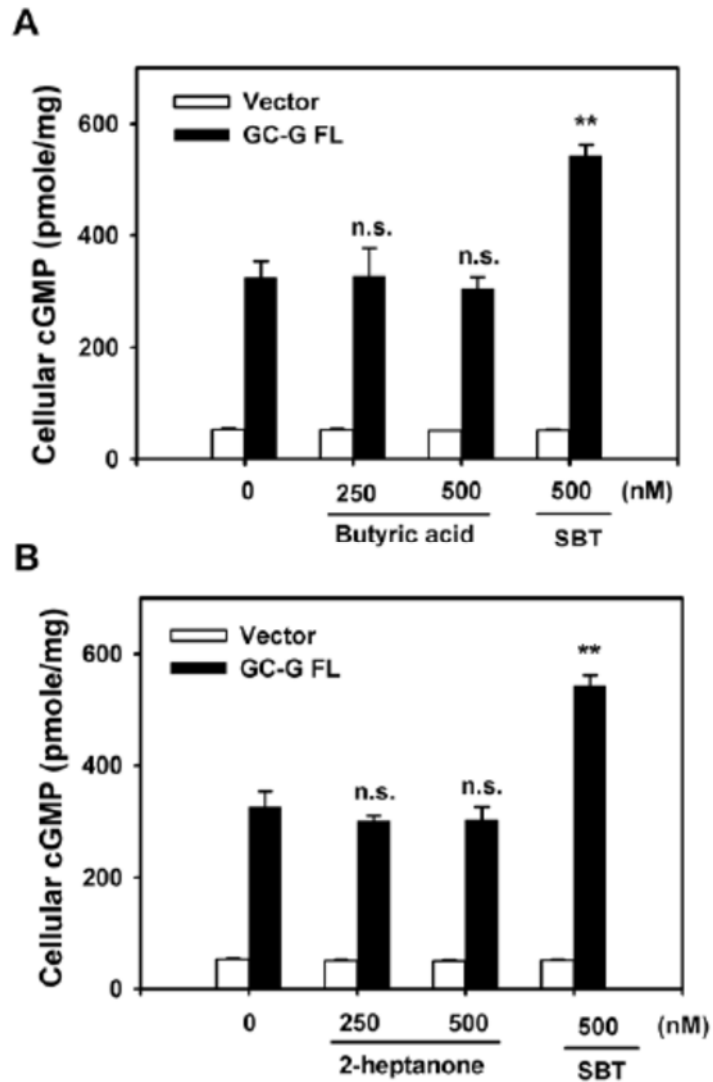

**Appendix Figure S1: Butyric acid and 2-heptanone do not activate GC-G enzymatic activity.**

(A, B) Two days after transient transfection with an empty vector or a plasmid coding for FLAG-tagged GC-G FL, HEK-293T cells were incubated for 20 min with the indicated concentrations of butyric acid (A), 2-heptanone (B) or SBT (A, B) at 37 °C and cellular cGMP concentration was measured. Data are mean ± SD from three experiments in triplicate. n.s., not significant; \*\*P < 0.01.

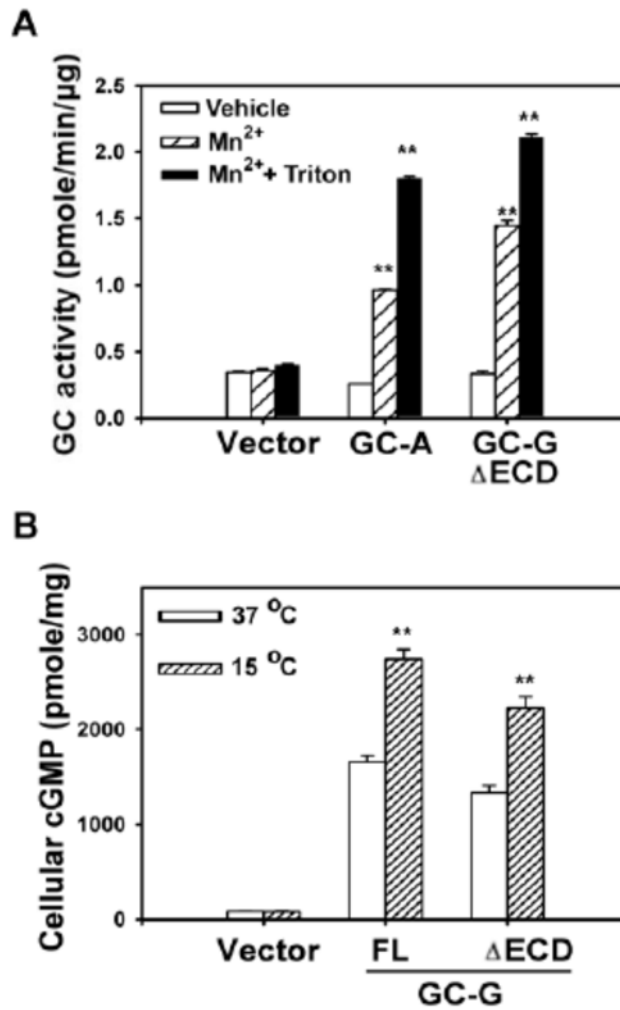

**Appendix Figure S2: The  $\Delta$ ECD variant of GC-G is capable of stimulated cGMP synthesis.**

(A) GC-G  $\Delta$ ECD has preserved its capacity to be activated by  $Mn^{2+}$ . Two days after transient transfection of HEK-293T cells with an empty vector or a plasmid encoding either the (FLAG-tagged) guanylyl cylase subtype GC-A or the (FLAG-tagged)  $\Delta$ ECD variant of GC-G, GC activity in cell membrane fractions was assayed for 20 min at 37 °C in the presence of 5 mM  $Mn^{2+}$  or 5 mM  $Mn^{2+}$  + 0.1% Triton X-100. All data are mean  $\pm$  SD from three experiments in triplicate. \*\*P < 0.01.

(B) Coolness stimulates intracellular cGMP accumulation in HEK-293T cells expressing the GC-G  $\Delta$ ECD mutant protein. Two days after transfection with an empty

vector or a plasmid coding either for (FLAG-tagged) GC-G FL or (FLAG-tagged) GC-G  $\Delta$ ECD, cells were exposed to the indicated ambient temperatures (37 or 15 °C) for 20 min before cellular cGMP concentration was determined. All data are mean  $\pm$  SD from three experiments in triplicate. \*\*P < 0.01.

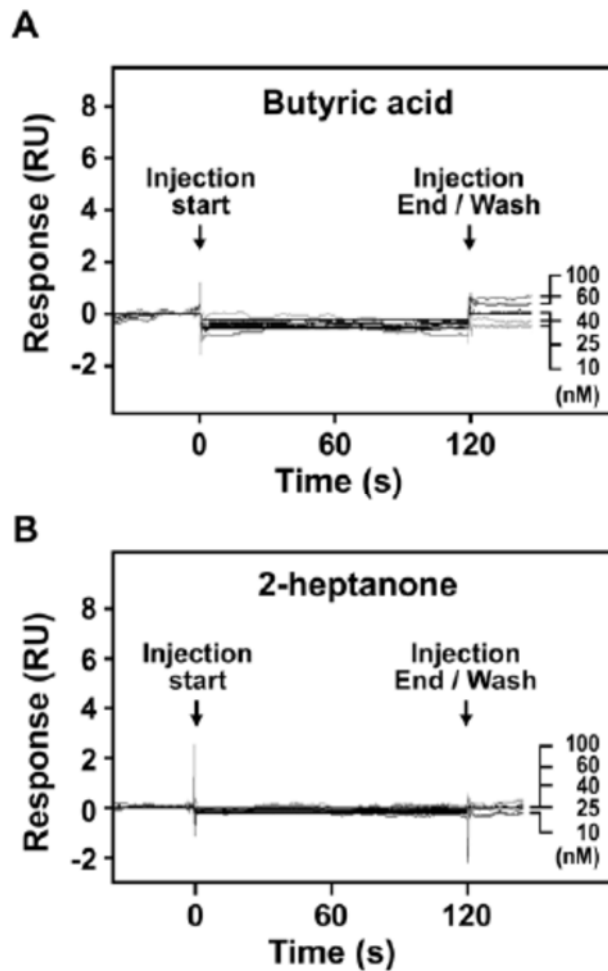

**Appendix Figure S3: Butyric acid and 2-heptanone do not bind to the ECD of GC-G.**

(A, B) Raw data from surface plasmon resonance (SPR) spectroscopy experiments upon injections with butyric acid (A) or 2-heptanone (B). The butyric acid and 2-heptanone concentrations used in these experiments are given. The black lines represent the global fit of the data to a 1:1 biomolecular interaction model. Responses are indicated in relative units (RU).

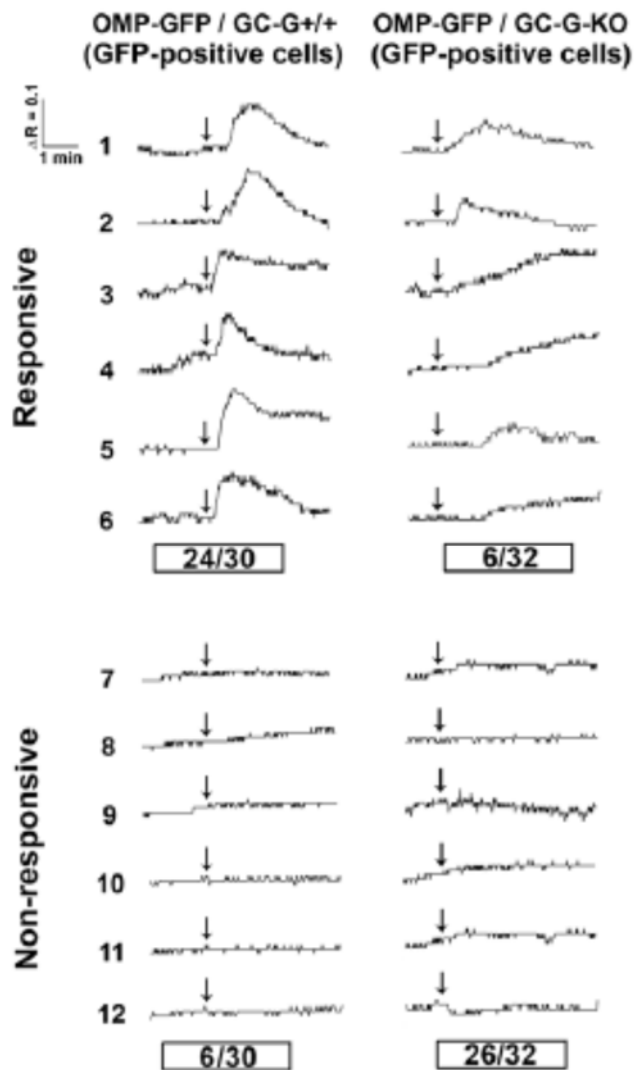

**Appendix Figure S4: Representative ratiometric calcium transients following exposure to SBT (1  $\mu$ M) in GFP-positive GG neurons from OMP-GFP/GC-G<sup>+/+</sup> and OMP-GFP/GC-G-KO pups.**

Six responsive and six non-responsive GG neurons from OMP-GFP/GC-G<sup>+/+</sup> as well as OMP-GFP/GC-G-KO mouse pups are exemplarily shown (SBT-induced  $\Delta R$  values greater than 0.05 were considered as responses). The onset of SBT application is indicated by arrows. SBT activated 24 of the 30 tested GFP-positive GG neurons from OMP-GFP/GC-G<sup>+/+</sup> mice while it only stimulated 6 of the 32 analyzed GFP-expressing GG neurons from OMP-GFP/GC-G-KO animals.

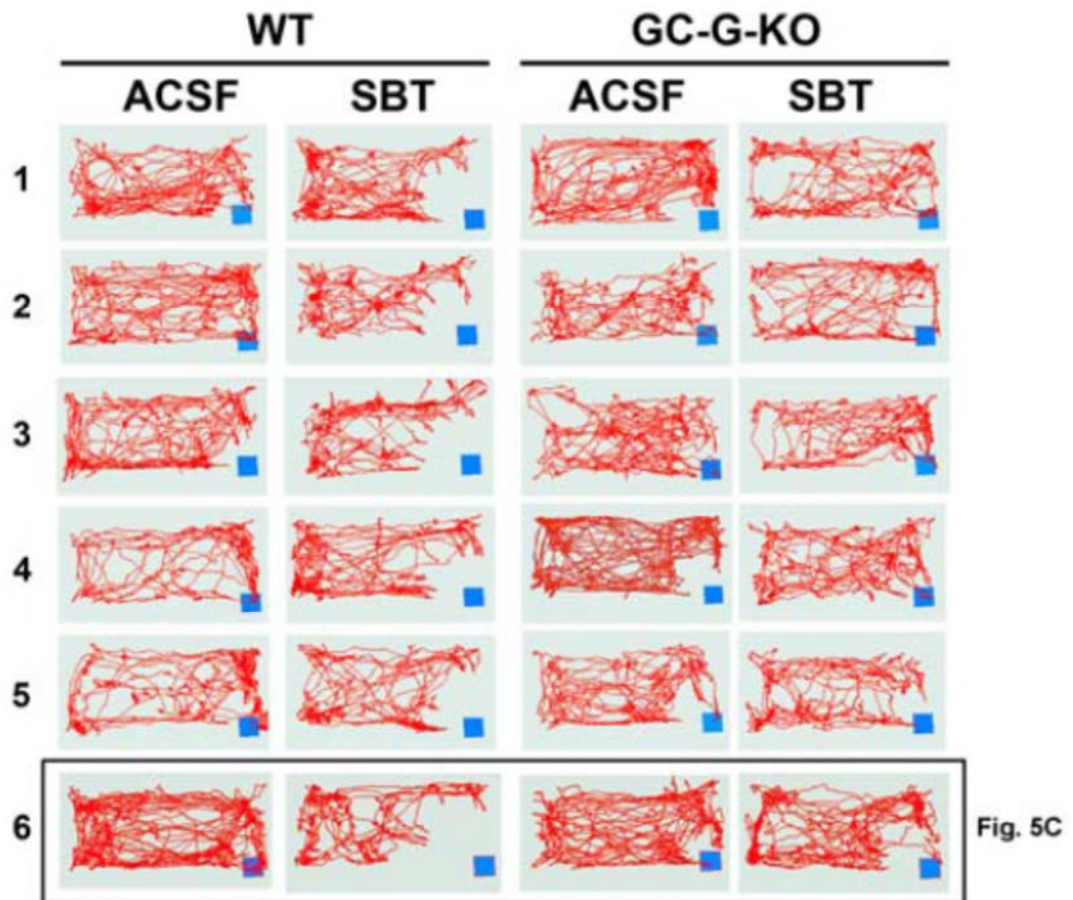

**Appendix Figure S5: Walking traces of all WT and GC-G-KO mice used in the avoidance behavior tests.**

Traces showing the trajectory of WT or GC-G-KO mice in the testing chamber during a 5-min session in the presence of SBT or ACSF (control). The position of the blotting paper soaked with either SBT or ACSF is indicated by the blue rectangle.

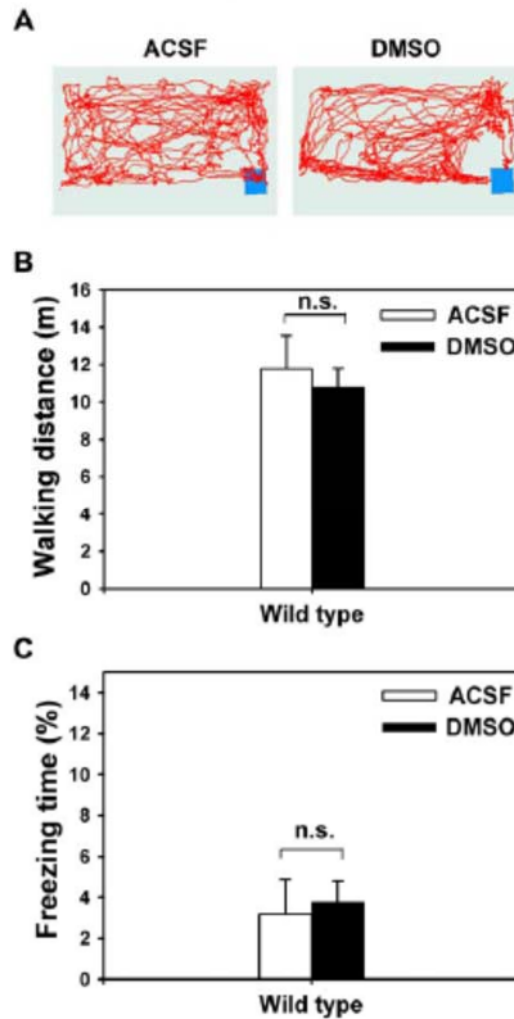

**Appendix Figure S6: DMSO does not affect freezing behavior and walking distances.**

(A) Examples of video frames tracking the trajectory of male WT mice (8-10 weeks old) exposed to a piece of blotting paper impregnated with 50  $\mu$ l of 1% DMSO (diluted in ACSF) or 50  $\mu$ l ACSF buffer (control).

(B-C) Analyses of video tracks revealed that DMSO did not significantly alter walking distance (B) or freezing time (C) as compared to ACSF. For each stimulus (DMSO or ACSF), 3 animals were analyzed.
